# Supplementary material for: A chemo-microbial hybrid process for the production of 2-pyrone-4,6-dicarboxylic acid as a promising bioplastic monomer from PET waste
Source: Royal Society of Chemistry journal article supplement (doi:10.1039/d0gc00007h), 2020-01-01
Supplement: d0gc00007h1.pdf [file d0gc00007h1.pdf]

## Electronic Supplementary Information

# A chemo-microbial hybrid process for the production of 2-pyrone-4,6-dicarboxylic acid as a promising bioplastic monomer from PET waste

*Myung Jong Kang,<sup>a,‡</sup> Hee Taek Kim,<sup>b,‡</sup> Minwoo Lee,<sup>a,‡</sup> Kyung-An Kim,<sup>a</sup> Tae Uk Khang<sup>b</sup> Hye*

*Min Song<sup>c</sup>, Si Jae Park,<sup>c,\*</sup> Jeong Chan Joo,<sup>b,\*</sup> Hyun Gil Cha<sup>a,\*</sup>*

<sup>a</sup> Bio-based Chemistry Research Center, Advanced Convergent Chemistry Division, Korea Research Institute of Chemical Technology (KRICT), Ulsan 44429, Republic of Korea.

<sup>b</sup> Bio-based Chemistry Research Center, Advanced Convergent Chemistry Division, Korea Research Institute of Chemical Technology (KRICT), Daejeon 34602, Republic of Korea

<sup>c</sup> Division of Chemical Engineering and Materials Science, Ewha Womans University, Seoul 03760, Republic of Korea.

Corresponding author

Si Jae Park: parksj93@ewha.ac.kr

Jeong Chan Joo: jcjoo@kRICT.re.kr

Hyun Gil Cha: hgcha@kRICT.re.kr

<sup>‡</sup>These authors contributed equally to this work.

### **Calculation of PDC conversion yield**

$$PDC \text{ Conversion yield (\%)} = \frac{\text{Produced PDC } \left(\frac{g}{L}\right)}{\text{Initial TPA } \left(\frac{g}{L}\right)} \times \text{Conversion factor } (C_f) \times 100$$

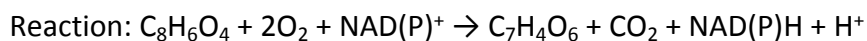

$$\text{Conversion factor } (C_f) = \frac{1 \text{ mol of PDC}}{1 \text{ mol of TPA}} = \frac{184.1}{166.13} = 1.11$$

Where, conversion factor ( $C_f$ ) is theoretical maximal value for the conversion of TPA to PDC considering molecular weight change by enzymatic reactions (LigABC). Because TPA can be converted to PDC without by-pathway, conversion factor is obtained based on molecular weight of TPA and PDC.

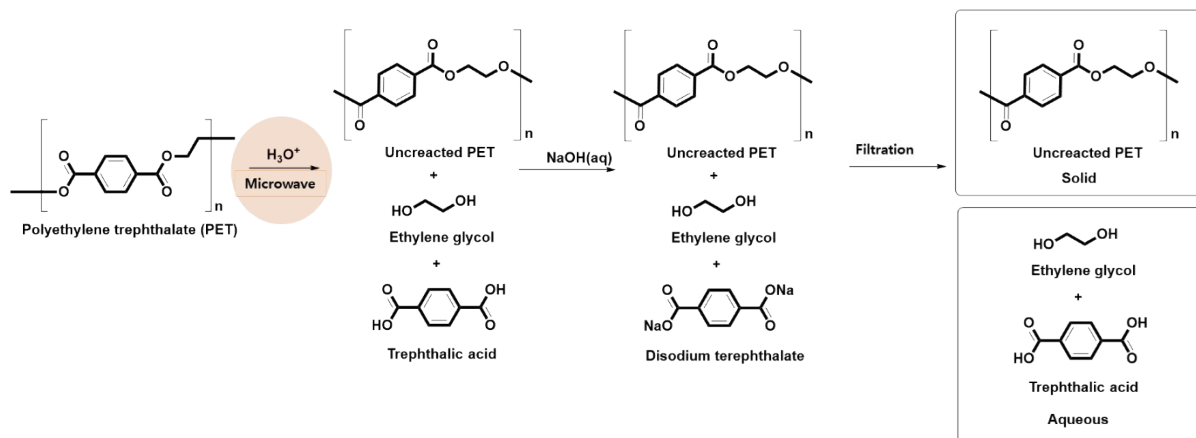

**Scheme S1.** Overall reaction scheme of PET hydrolysis.

**Table S1.** Plasmids and bacterial strains used in this study.

| Strain and plasmid                | Relevant characteristic                                                                                                                                          | Reference<br>or source |
|-----------------------------------|------------------------------------------------------------------------------------------------------------------------------------------------------------------|------------------------|
| <b>Strain</b>                     |                                                                                                                                                                  |                        |
| <i>E. coli</i> XL1-Blue           | <i>recA1 endA1 gyrA96 thi-1 hsdR17 supE44 relA1 lac</i> [F' <i>proAB lacI<sup>q</sup>ΔM15 Tn10</i> (Tet <sup>R</sup> )]                                          | Stratagene             |
| <b>Strains</b>                    |                                                                                                                                                                  |                        |
| <i>E. coli</i> CHMS               | <i>E. coli</i> XL1-Blue with pKE112 ligAB                                                                                                                        | this study             |
| <i>E. coli</i> PDC <sub>PCA</sub> | <i>E. coli</i> XL1-Blue with pKE112 ligABC                                                                                                                       | this study             |
| <i>E. coli</i> PDC <sub>TPA</sub> | <i>E. coli</i> XL1-Blue with pKE112tphB ligABC and pKM212 tphAabc                                                                                                | this study             |
| <i>E. coli</i> PCA                | <i>E. coli</i> XL1-Blue with pKE112 tphB and pKM212 tphAabc                                                                                                      | this study             |
| <b>Plasmid</b>                    |                                                                                                                                                                  |                        |
| pKE112 ligAB                      | pKE112; P <sub>tac</sub> promoter, <i>Sphingomonas paucimobilis</i> strain <i>ligAB</i> gene, Amp <sup>R</sup>                                                   | this study             |
| pKE112 ligABC                     | pKE112; P <sub>tac</sub> promoter, <i>Sphingomonas paucimobilis</i> strain <i>ligABC</i> gene, Amp <sup>R</sup>                                                  | this study             |
| pKE112 tphB                       | pKE112; P <sub>tac</sub> promoter, <i>Comamonas</i> sp. strain E6 <i>tphB</i> genes, Amp <sup>R</sup>                                                            | this study             |
| pKM212 tphAabc                    | pKM212; P <sub>tac</sub> promoter, <i>Comamonas</i> sp. strain E6 <i>tphAabc</i> genes, Km <sup>R</sup>                                                          | this study             |
| pKE112 tphBligABC                 | pKE112; P <sub>tac</sub> promoter, <i>Comamonas</i> sp. strain E6 <i>tphB</i> gene, <i>Sphingomonas paucimobilis</i> strain <i>ligABC</i> gene, Amp <sup>R</sup> | this study             |

**Table S2.** Gene information used in this study.

| Gene         | UniProtKB Accession number | Sequence                                                                                                                                                                                                                                                                                                                                                                                                                                                                                                                                                                                                                                                                                                                                                                                                                                                                                                                                                                                                                                                                                                                                            |
|--------------|----------------------------|-----------------------------------------------------------------------------------------------------------------------------------------------------------------------------------------------------------------------------------------------------------------------------------------------------------------------------------------------------------------------------------------------------------------------------------------------------------------------------------------------------------------------------------------------------------------------------------------------------------------------------------------------------------------------------------------------------------------------------------------------------------------------------------------------------------------------------------------------------------------------------------------------------------------------------------------------------------------------------------------------------------------------------------------------------------------------------------------------------------------------------------------------------|
| <i>tphAa</i> | Q3C1D2                     | <p>ATGAACCACCAGATCCATATCCACGACTCCGATATCGCGTTCCTGCGCGCCCGGGCA<br/> ATCCGTACTGGATGCAGCTCTGCAGGCCGGCATCGAGCTGCCCTATTCCTGCCGCAAAG<br/> GTAGCTGTGGCAACTGTGCGAGTACGCTGCTCGACGAAAATTGCCTCCTCAATGGC<br/> ATGGCCGTGCGAAACGAACTCTGCGCCTCGGAACAAGTGCTGCTGTGCGGCTGCACTG<br/> CAGCCAGCGATATACGTATCCACCCGAGCTCCTTTCGCCGTCTCGACCCGGAAGCCCGA<br/> AAACGTTTTACGGCCAAGGTGTACAGCAATACACTGGCGGCACCCGATGTCTCGCTGCT<br/> GCGCCTGCGCCTGCCTGTGGGCAAGCGCGCAAATTTGAAGCCGGCCAATACCTGCTG<br/> ATTCACCTCGACGACGGGGAAAGCCGCAGCTACTCTATGGCCAATCCACCCCATGAGA<br/> GCGATGGCATCACATTGCATGTCAGGCATGTACCTGGTGGTTCGCTTCAGCACTATCGTT<br/> CAGCAGTTGAAGTCTGGTGACACATTGGATATCGAACTGCCATTCGGCAGCATCGCACT<br/> GAAGCCTGATGACGCAAGGCCCTGATTTGCGTTGCGGGTGGCACGGGATTTGCGCCC<br/> ATTAATCCGTTCTTGATGACTTAGCCAAACGCAAGGTTAGCGCGACATCACGCTGAT<br/> CTGGGGGGCTCGCAACCCCTCGGCCTGTATCTTCTAGCGCCATCGACAAGTGGCGC<br/> AAAGTCTGGCCACAGTTTCGCTACATTGCAGCCATCACCGACCTAGGCGATATGCCTGC<br/> GGATGCTCACGCAGGTGCGGTGGATGACGCGCTACGCACTACTTTGGCAACCTGCAC<br/> GATCATGTGGTGCCTGCTGTGGCTCACCAGCTCTGGTTCAATCAGTGCGCACAGCCGC<br/> TTCCGATATGGGCCTGCTTGACAGGACTTCCACGCGGATGTTTTTTCGACAGGCCCGA<br/> CTGGTCACCACTAG</p> |
| <i>tphAb</i> | Q3C1D5                     | <p>ATGCAAGAATCCATCATCCAGTGGCATGGGGCCACTAATACGCGCGTGCCTTTTGGTAT<br/> CTATACCGACACAGCCAATGCTGATCAGGAACAGCAGCGCATCTATCGCGGCGAGGTC<br/> TGGAATACTTGTGCCTGGAATCTGAAATTCCTGGGGCCGGTGATTTCCGCACTACCTT<br/> TGCCGGTGAAACACCGATAGTTGTCGTACGGGATGCCGACCAGGAAATCTACGCCTTC<br/> GAGAACCCTGCGCGCATCGCGGCTCTCATCGCTCTGGAGAAATCGGGCCGTACGG<br/> ATAGTTTCCAGTGCCTATCACGCCTGGAGCTACAACCGACAGGGAGATCTGACCGG<br/> CGTTGCCTTCGAGAAAGGTGTCAAGGGCCAGGGTGGCATGCCGGCCTCATTCTGCAAA<br/> GAAGAGCATGGCCCGCGCAAGCTCCGCGTGGCTGTCTTTTTCGGTTTGGTCTTTGGCA<br/> GTTTTTCCGAGGACGTGCCAGCATTGAGGATTACCTTGGCCCTGAGATTTGCGAGCGC<br/> ATAGAGCGCGTGTGCACAAGCCGTAGAAGTCATCGGTCGCTTTCACGAAAAGCTGC<br/> CTAACAAGTGAAGCTCTACTTCGAGAACGTGAAGGACAGCTATCACGCCAGCCTCTG<br/> CATATGTTCTTACCACCTTCGAGCTGAATCGCCTCTCACAAAAGGCGGTGCATCGTC</p>                                                                                                                                                                                                                                                                                                                                                           |

|              |        |                                                                                                                                                                                                                                                                                                                                                                                                                                                                                                                                                                                                                                                                                                                                                                                                                                                                                                                                                                                                                                             |
|--------------|--------|---------------------------------------------------------------------------------------------------------------------------------------------------------------------------------------------------------------------------------------------------------------------------------------------------------------------------------------------------------------------------------------------------------------------------------------------------------------------------------------------------------------------------------------------------------------------------------------------------------------------------------------------------------------------------------------------------------------------------------------------------------------------------------------------------------------------------------------------------------------------------------------------------------------------------------------------------------------------------------------------------------------------------------------------|
|              |        | GACGAGTCGGGTGGCCACCATGTGAGCTATTCCATGATCGATCGCGGCGCCAAAGACG<br>ACTCGTACAAGGACCAGGCCATCCGCTCCGACAACGAGCGTTACCGGCTCAAAGATCC<br>TAGCCTTCTAGAGGGCTTTGAGGAGTTCGAGGACGGCGTGACCTGCAGATCCTTTCT<br>GTGTTCCCTGGCTTTGTGCTGCAGCAGATTGAGAACAGCATCGCCGTGCGTCAGTTGCT<br>GCCCCAAGAGCATCTCCAGCTCGGAACTCAACTGGACCTATCTTGGCTATGCAGATGACA<br>GTGCCGAGCAACGCAAGGTCAGACTCAAACAGGCCAACCTTATCGGCCCGGCCGGATT<br>CATTTCCATGGAAGACGGAGCTGTGCGTGGATTCTGTCAGCGTGGCATCGCAGGCGCT<br>GCCAACCTTGATGCAGTCATCGAGATGGGCGGAGACCACGAAGGCTCTAGCGAGGGC<br>CGCGCCACGGAAACCTCGGTACGCGGCTTTTGAAGGCCTACCGCAAGCATATGGGAC<br>AGGAGATGCAAGCATGA                                                                                                                                                                                                                                                                                                                                                                                                                                             |
| <i>tphAc</i> | Q3C1D4 | ATGATCAATGAAATTCAAATCGCGGCCTTCAATGCCGCCTACGCGAAGACCATAGACA<br>GTGATGCAATGGAGCAATGGCCAACCTTTTTACCAAGGATTGCCACTATTGCGTCACC<br>AATGTCGACAACCATGATGAGGGACTTGTGCCGGCATTGTCTGGGCGGATTGCGCAGG<br>ACATGCTCACCAGCGAATTTCTGCGCTGCGGAAGCCAATATCTACGAGCGCCACCGC<br>TATCGCCATATCCTGGGTCTGCCTTCGATCCAGTCAGGCGATGCAACACAGGCCAGCGC<br>TTCCACTCCGTTTCATGGTGCTGCGCATCATGCATACAGGGGAAACAGAGGTCTTTGCCA<br>GCGGTGAGTACCTCGACAAATTCACCACGATCGATGGCAAGTTACGTCTGCAAGAACG<br>CATCGCGGTTTTCGACAGCAGGTGACGGACACGCTGATGGCATTGCCGCTATGA                                                                                                                                                                                                                                                                                                                                                                                                                                                                                                                                  |
| <i>tphB</i>  | Q3C1D3 | ATGACAATAGTGCACCGTAGATTGGCTTTGGCCATCGGCGATCCCCACGGTATTGGCCC<br>AGAAATCGCACTGAAAGCTCTCCAGCAGCTGTCTGTCACCGAAAGGTCTCTTATCAAGG<br>TCTATGGACCTTGAGCGCTCTCGAGCAAGCCGCACGGGTTTTCGAAATGGAGCCGCT<br>TCTTCAAGACATCGTTCACGAGGAAGCCGGCACACTTACACAACCAAGTTCAATGGGGA<br>GAAATCACCCCGCAGGCTGGTCTATCTACGGTGCAATCCGCAACAGCGGCTATCCGAG<br>CGTGCGAAAACGGCGAAGTCGATGCCGTCATTGCCTGCCCTACCATGAAACGGCCAT<br>TCACCGCGCAGGCATAGCGTTCAGCGGCTACCCATCTTTGCTCGCCAATGTTCTTGGA<br>TGAACGAAGACCAGGTATTCTGATGCTGGTGGGGGCTGGCCTGCGCATAGTGCATGT<br>CACTTTGCATGAAAGCGTGCGCAGCGCATTGGAGCGGCTCTCTCCTCAGTTGGTGGTCA<br>ACGCGGCGCAGGCTGCCGTGCGACATGCACCTTACTCGAGTGCCTAAACCAAAAAGT<br>CGCTGTATTCGGGATCAACCCTCATGCATCTGAAGGACAGTTGTTCCGGCCTGGAGGACT<br>CCCAGATCACCGTTCGCTGTGCGAGACTGCGCAAGCGCGGCTAGCAGTAGACGG<br>CCCCATGGGAGCTGACATGGTTCTGGCACAGCGCAAGCACGACCTGTATGTAGCCATG<br>CTGCACGATCAGGGCCATATCCCCATCAAGCTGCTGGCACCTAACGGAGCCAGCGCAC<br>TATCTATCGGTGGCAGGGTGGTGCTTTCCAGCGTGGGCCATGGCAGCGCCATGGACAT<br>TGCCGGCCGTGGCGTGGCTGACGCCACGGCCCTCTACGCACAATAGCCCTACTCGGA<br>GCCAACCGGTCTGA |
| <i>ligA</i>  | P22635 | ATGACCGAGAAGAAAGAGAGAATCGACGTTACGCCTATCTCGCCGAGTTTGACGACA<br>TTCCCGCACCCCGTGTTCACCGCCAGCGCGCGCAAGGGCTATAATCTCAACCA<br>GTTCCGCGATGAGCCTGATGAAGGCCGAGAACCGCGAGCGGTTCAAGGCCGACGAGAG                                                                                                                                                                                                                                                                                                                                                                                                                                                                                                                                                                                                                                                                                                                                                                                                                                                            |

|             |        |                                                                                                                                                                                                                                                                                                                                                                                                                                                                                                                                                                                                                                                                                                                                                                                                                                                                                                                                                                                                                                        |
|-------------|--------|----------------------------------------------------------------------------------------------------------------------------------------------------------------------------------------------------------------------------------------------------------------------------------------------------------------------------------------------------------------------------------------------------------------------------------------------------------------------------------------------------------------------------------------------------------------------------------------------------------------------------------------------------------------------------------------------------------------------------------------------------------------------------------------------------------------------------------------------------------------------------------------------------------------------------------------------------------------------------------------------------------------------------------------|
|             |        | CGCCTATCTGGACGAGTGGAACTCACGCCCGCCGCAAGGCCGCGTGTGGCCCCG<br>GACTACAATGCGATGATCGACGAGGGCGGGAATGTCTATTTCTGTCCAAGCTGTTCTC<br>GACCGACGGCAAGAGCTTCCAGTTCCGCCGCGGCTCGATGACCGGCATGACTCAGGAA<br>GAATATGCACAGATGATGATCGATGGCGGCCGTTCCGCCGCGGGTGTGCGCTCGATCA<br>AGGGAGGCTACTGA                                                                                                                                                                                                                                                                                                                                                                                                                                                                                                                                                                                                                                                                                                                                                                     |
| <i>ligB</i> | P22636 | ATGGCACGCGTTACCACGGGCATCACGTCCAGCCACATTCGCGCTCGGCGCGGCCA<br>TCCAGACCGGCACCAGCGACAATGATTACTGGGGCCCGGTGTTCAAGGGCTACCAGCC<br>GATCCGCGACTGGATCAAGCAGCCCGCAACATGCCGGACGTCGTGATCCTGGTCTAT<br>AACGACCATGCCTCGGCCTTGCAGATGAACATCATCCCGACCTTCGCGATCGGCTGCGC<br>GGAAACGTTCAAGCCC GCCGACGAGGGATGGGGCCCGCGCCCGGTGCCGACGTGAA<br>GGGCCATCCGACCTTGCTGGCACATCGCCAGAGCTGATCCTCGACGAGTTGAC<br>ATGACCATCATGAACCAGATGGACGTCGATCATGGCTGCACCGTGCCGCTCTCGATGAT<br>CTTCGGCGAGCCCGAGGAATGGCCGTGCAAGGTATCCCTTCCCGGTCAATGTCGTC<br>ACTTATCCGCCGCGTCCGGCAAGCGCTGCTTCGCGCTCGGTGACAGCATCCGCGCCG<br>CGGTGAGAGCTTCCCGAAGACCTCAACGTCCATGTCTGGGGCACCGGCGGCATGAG<br>CCACCAGCTTCAGGGCCCGCGCGCCGGCCTCATCAACAAGGAGTTCGACCTGAACTTCA<br>TCGACAAGCTGATCAGCGACCCCGAGGAGCTGAGCAAGATGCCGCACATCCAGTATCT<br>GCGCGAAAAGCGGATCGGAAGGCATCGAGCTGGTCATGTGGTTCATCATGCGCGGCGC<br>GCTGCCGAGAAGGTGCGGGATCTTACACCTTCTATCACATCCCGCCTCCAACCCG<br>CGCTCGGCGGATGATCCTGCAGCCGAGGAGACCGCAGGTACACCGCTCGAACC GC<br>GCAAGGTGATGAGCGGACACAGCCTGGCCAGGCCTGA                                                |
| <i>ligC</i> | Q9KWL3 | ATGAGAATAGCTCTCGCAGGCGCCGGCGCATTGCGCGAAAAACATCTCGACGGTCTCA<br>AGAATATCGACGGCGTCGAGATCGTCTCGATCATCAGCCGCAAGGCCGAGCAGGCCGC<br>GGAAGTCGCCGCAAATATGGCGCAAGCACAGCGGCACCGATCTTCCGAAGCGCTT<br>GCCCCTGACGATGTCGACGCGGTGATCCTCTGCACCCACCCAGATGCATGCCGAGC<br>AGGCCATTGCCTGCATGAATGCCGGCAAGCATGTCCAGGTGGAAATCCCGCTGGCGGA<br>CAGCTGGGCCGATGCCAAGCGGTGATGAAGAAGAGCCAGGAAACCGGCCTCGTCTG<br>CATGGTTCGGCCACACCCCGCTTCAACCCGAGCCACAGTATATCCACAACAAGATCG<br>TGCCCGGCGAGCTCGCCATCCAGCAGATGGACGTGCAGACCTATTTCTCCGCCGCAA<br>GAACATGAACGCCAAGGGCGAGCCGCGGTCTTGACGGACCATCTGCTCTGGACCAT<br>GCCGCGCACACGGTGGACCTGTTGCTTATCAGGCCGGCAAGATCGTGCAGGCCAATG<br>CCGTGCAGGGGCCGATCCATCCCGAGCTCGGCATCGCCATGGACATGTCGATCCAGCT<br>CAAGAGCGAGACGGGCGCGATCTGCACCCTGTCCCTCTCGTTCAACAATGACGGGCCG<br>CTCGGCACCTTCTCCGCTACATCTGCGACAACGGCACCTGGATCGCGCGCTACGACGA<br>TCTGGTGACCGGCAAGGAAGAACCCGTGGACGTGAGCAAGGTGACGTGTCGATGAA<br>CGGGATCGAGCTGCAGGATCGGGAATTCATCGCGGCGATCCGCGAAGGTGCGGAGCC<br>CAATTCGTGCGGTGGCGAGAGTGCTCGATTGCTATCGGGTGTGGGCGAACTCGAGGTC<br>CAGCTCGAAAAGCAGGGCTGA |





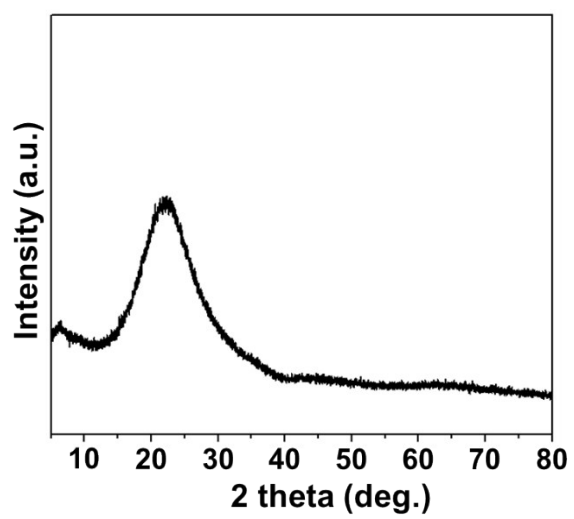

**Fig. S1.** XRD patterns of SiO<sub>2</sub>-R catalyst.

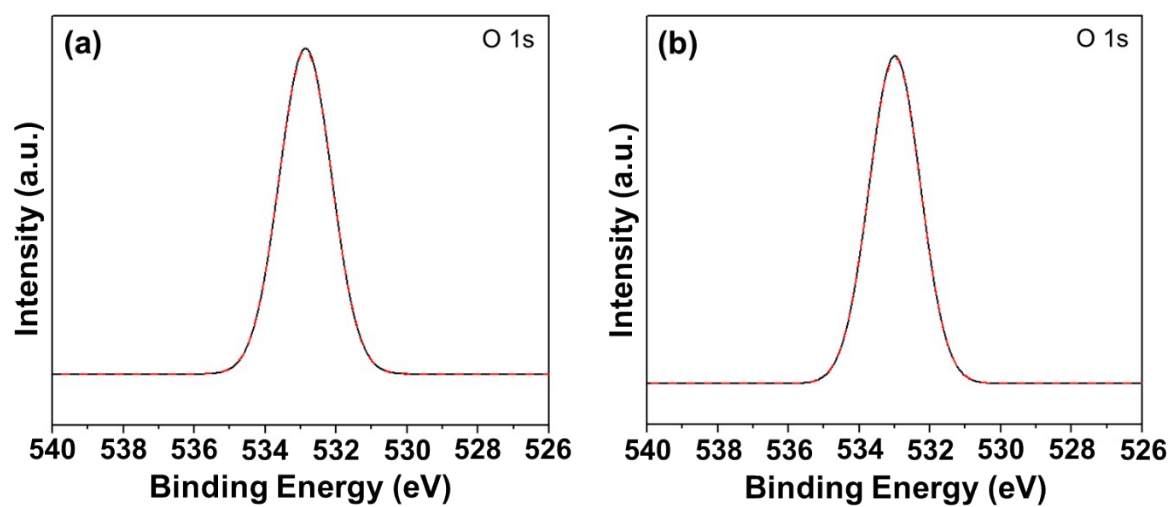

**Fig. S2.** O 1s XPS spectra of rice husk derived (a) SiO<sub>2</sub>-R and (b) thiol-SiO<sub>2</sub>.

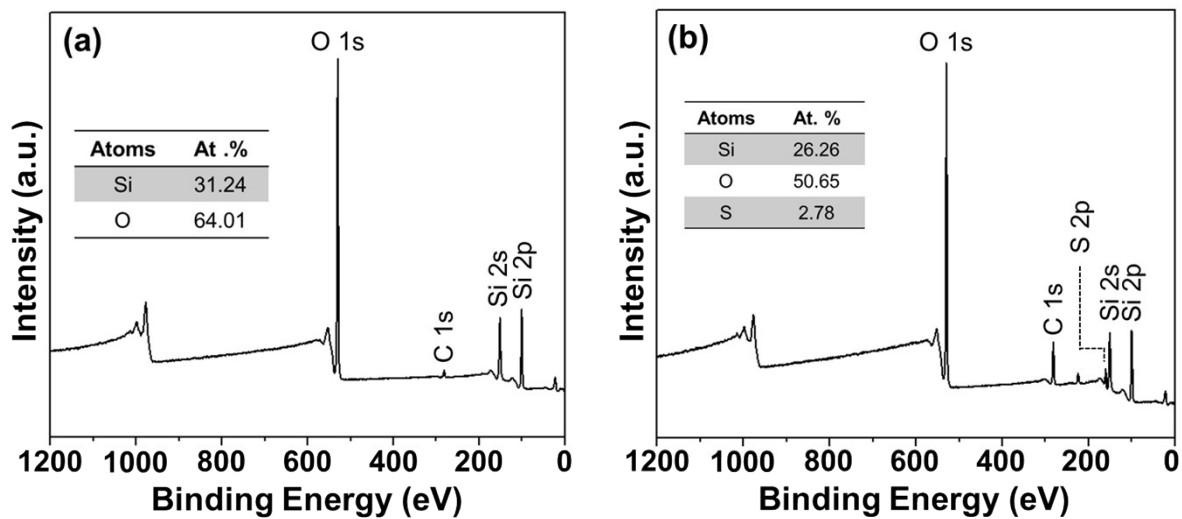

**Fig. S3.** XPS survey spectra of (a) rice husk derived  $\text{SiO}_2\text{-R}$  and (b) thiol- $\text{SiO}_2$  (inset: atomic ratio of each atomic species).

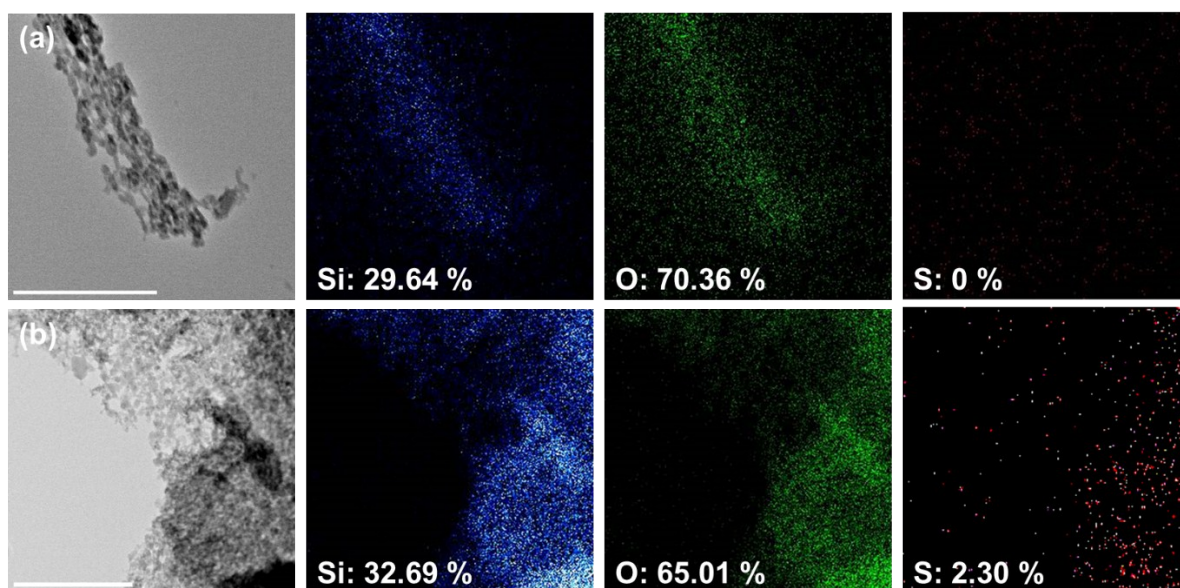

**Fig. S4.** TEM-EDS mapping image of (a) SiO<sub>2</sub>-R and (b) thiol-SiO<sub>2</sub> catalysts (scale bars are 300 nm).

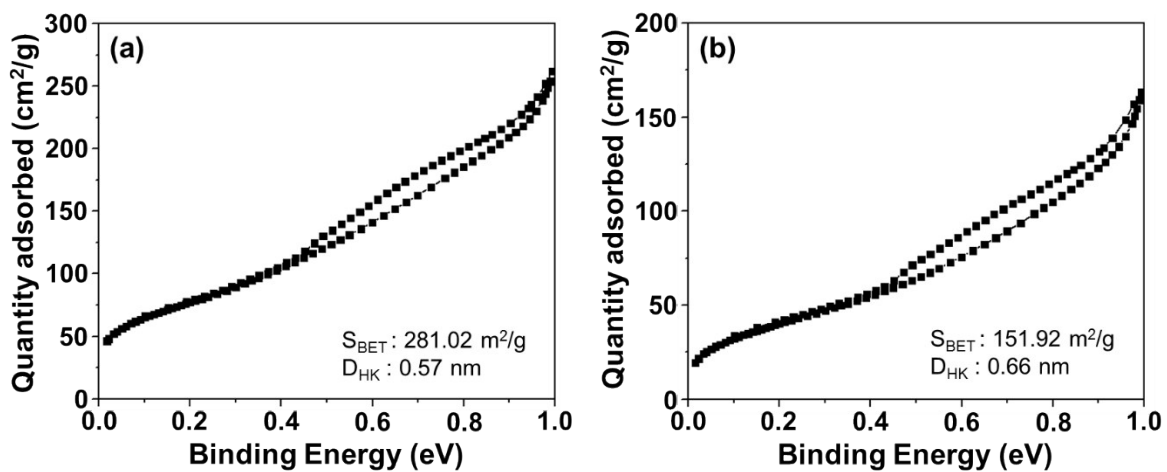

**Fig. S5.** BET hysteresis loop during N<sub>2</sub> adsorption/desorption with (a) rice husk derived SiO<sub>2</sub>-R and (b) thiol-SiO<sub>2</sub>.

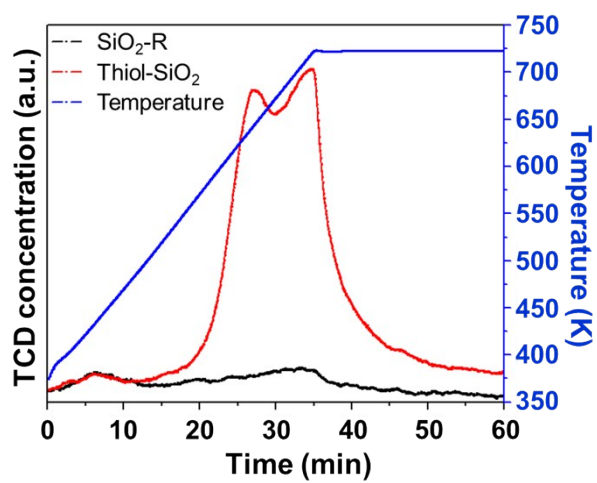

**Fig. S6.** NH<sub>3</sub>-TPD curves of rice husk derived SiO<sub>2</sub>-R and thiol-SiO<sub>2</sub>.

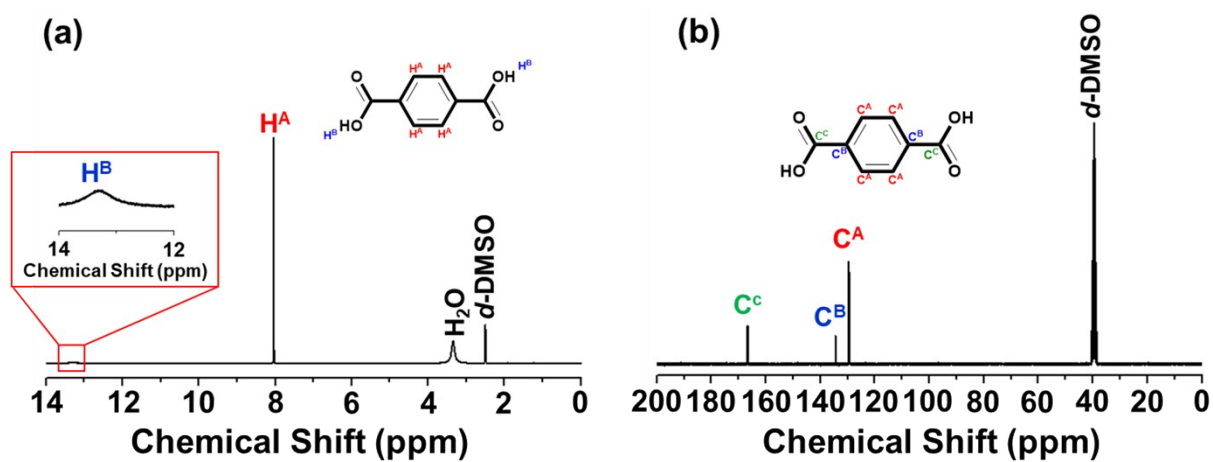

Fig. S7. (a) <sup>1</sup>H NMR and (b) <sup>13</sup>C NMR of terephthalic acid (TPA) from PET hydrolysis

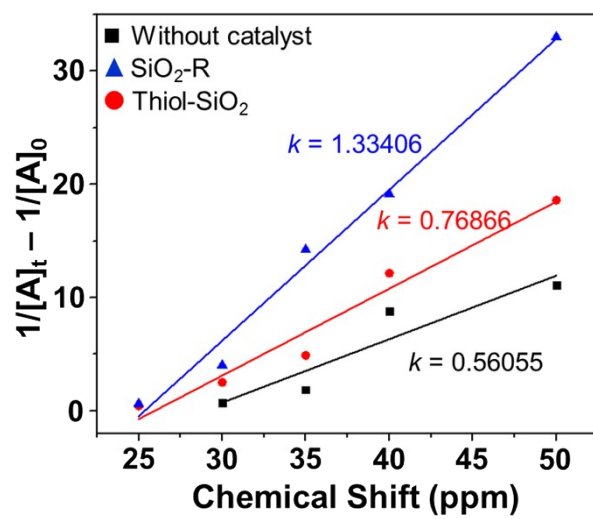

**Fig. S8.** Reaction constant ( $k$ ) calculation of PET hydrolysis by without catalyst, rice husk derived SiO<sub>2</sub>-R and thiol-SiO<sub>2</sub>.



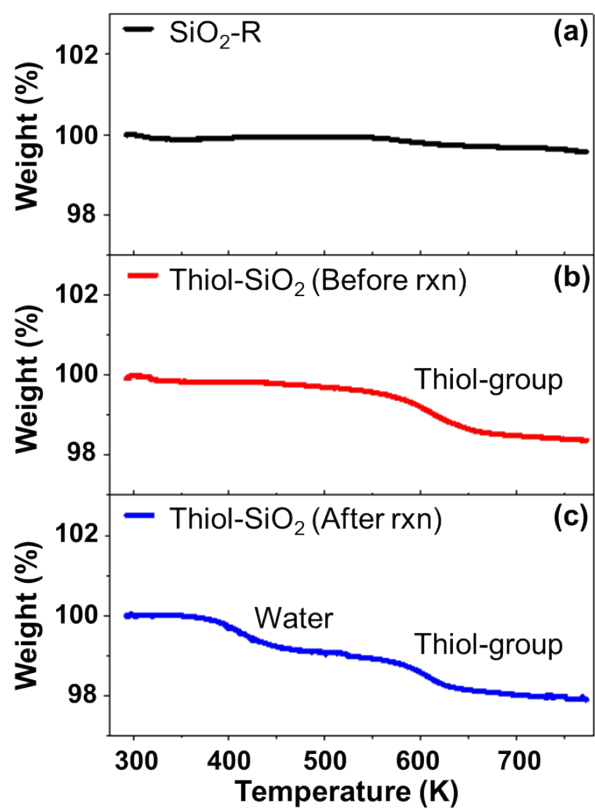

**Fig. S9.** Thermal gravity analysis curves of (a) SiO<sub>2</sub>-R catalyst and Thiol-SiO<sub>2</sub> catalyst (b) before reaction and (c) after 6 cycles of reaction.

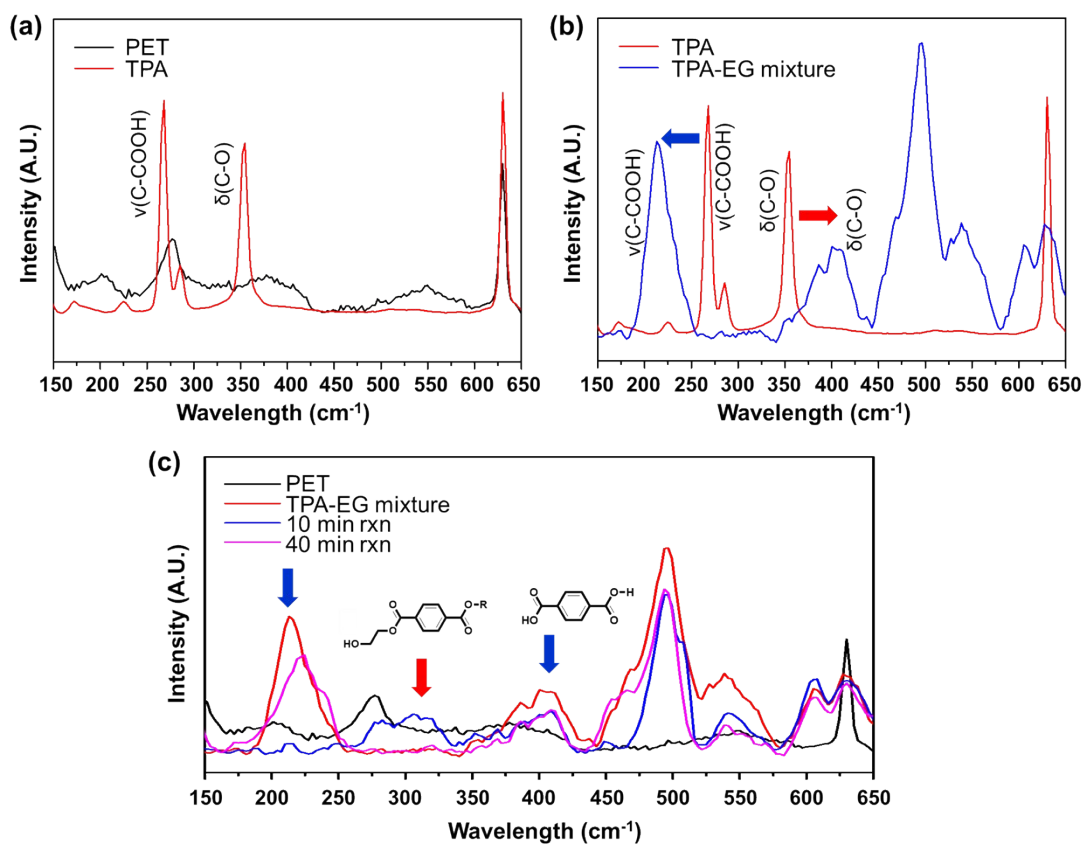

**Fig. S10.** Raman spectra of (a) PET and TPA, (b) TPA and TPA-EG mixture in water and (c) 10 min and 40 min reacted solution.

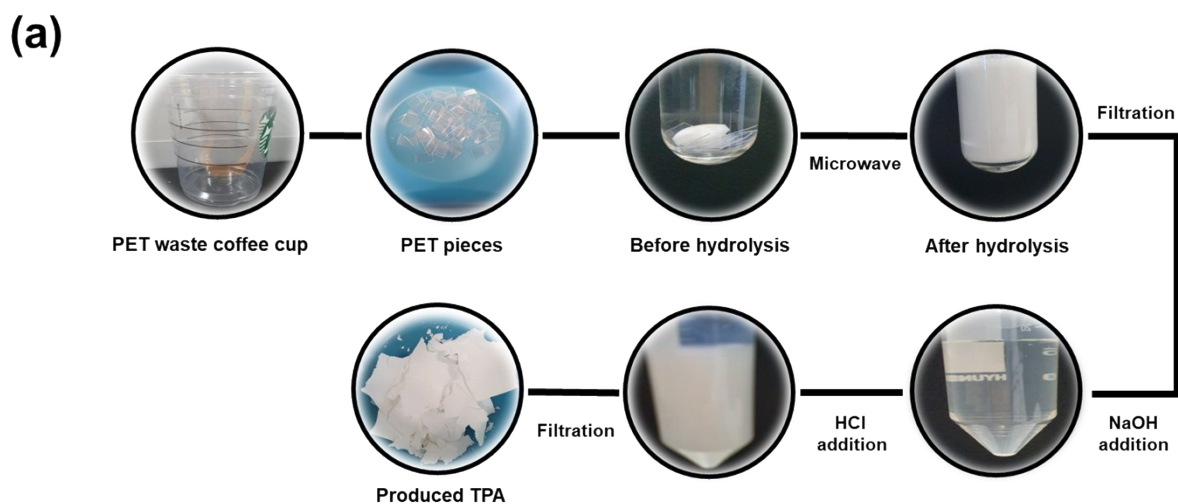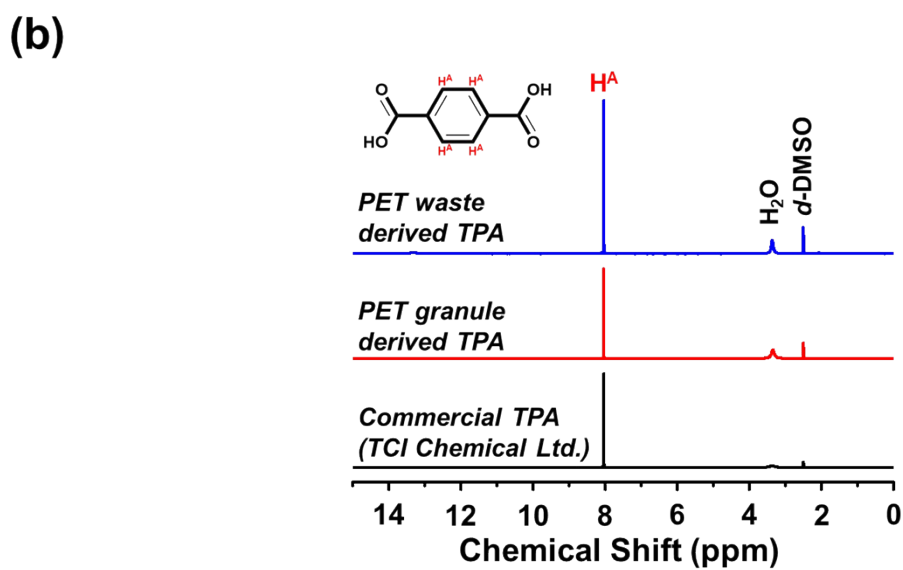

**Fig. S11.** (a) images of producing TPA from PET waste by microwave-assisted hydrolysis, (b) <sup>1</sup>H NMR of PET waste derived TPA, Aldrich PET granule derived TPA and reagent grade TPA purchased from TCI chemical Ltd.

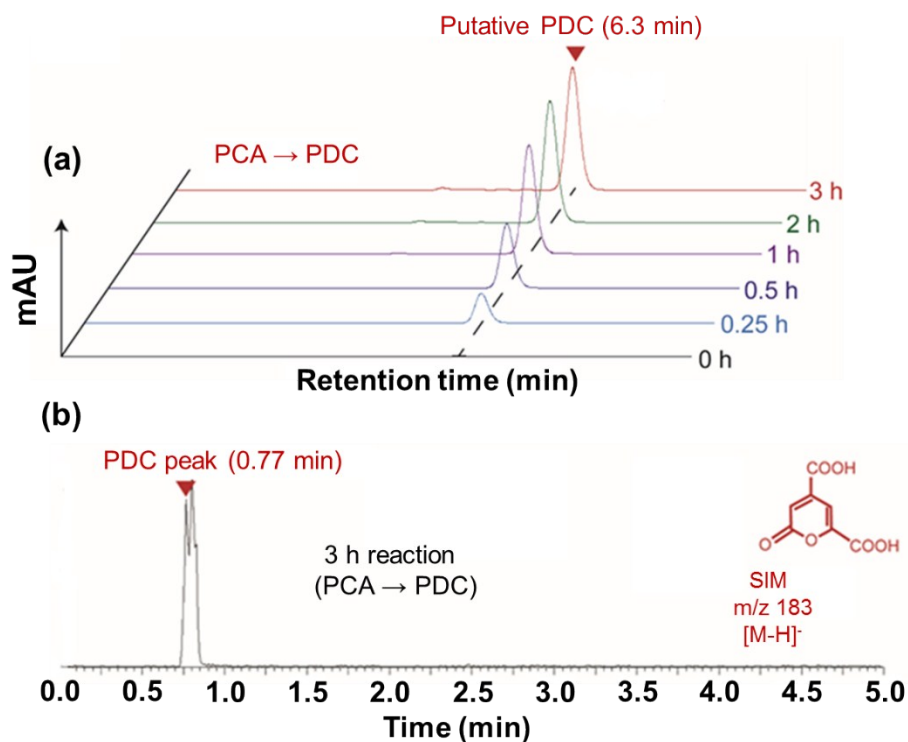

**Fig. S12.** Identification of PDC synthesis by whole cell conversion of PCA to PDC. (a) Time course HPLC chromatogram, (b) Putative PDC peak was increased by whole cell conversion reaction using *E. coli* PDC<sub>PCA</sub> ( $OD_{600}=30$ ) as reaction time was increased confirmation of PDC synthesis by LC-MS (SIM mode).

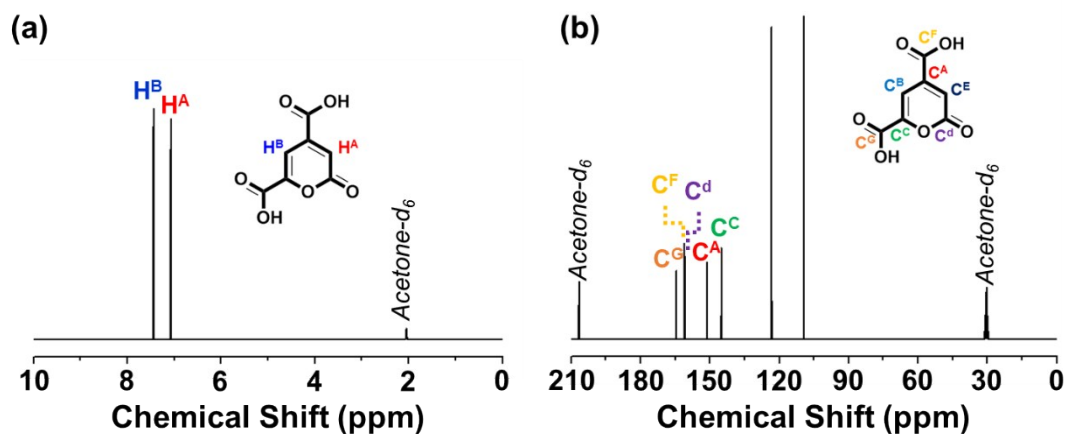

**Fig. S13.** (a)  $^1\text{H}$  NMR and (b)  $^{13}\text{C}$  NMR spectra of purified PDC.

Purified PDC through microbial conversion is confirmed by NMR spectroscopy. In  $^1\text{H}$  proton NMR shown in Fig. S12 (a), two peaks appeared due to two kinds of protons in pyran ring of PDC (denoted as  $\text{H}^{\text{A}}$  and  $\text{H}^{\text{B}}$ ), which has chemical shift value of 7.06 ppm and 7.43 ppm, respectively. The  $^{13}\text{C}$  carbon NMR spectrum of PDC is also shown in Fig. S12 (b). PDC have seven kinds of carbons, which five are in pyran ring structure, shows chemical shift value of 151.23 ppm (denoted as  $\text{C}^{\text{A}}$ ), 109.45 ppm (denoted as  $\text{C}^{\text{B}}$ ), 145.10 ppm (denoted as  $\text{C}^{\text{C}}$ ), 160.82 ppm (denoted as  $\text{C}^{\text{D}}$ ) and 123.37 ppm (denoted as  $\text{C}^{\text{E}}$ ). The other two types of carbons for each carboxylic acid groups in PDC but differences in distance with oxygen atoms in pyran ring, which are 161.17 ppm (denoted as  $\text{C}^{\text{F}}$ ) and 164.61 ppm (denoted as  $\text{C}^{\text{G}}$ ). Above  $^1\text{H}$  and  $^{13}\text{C}$  NMR results of synthesized PDC are in a good accordance with previously reported NMR spectra of PDC.<sup>1</sup>



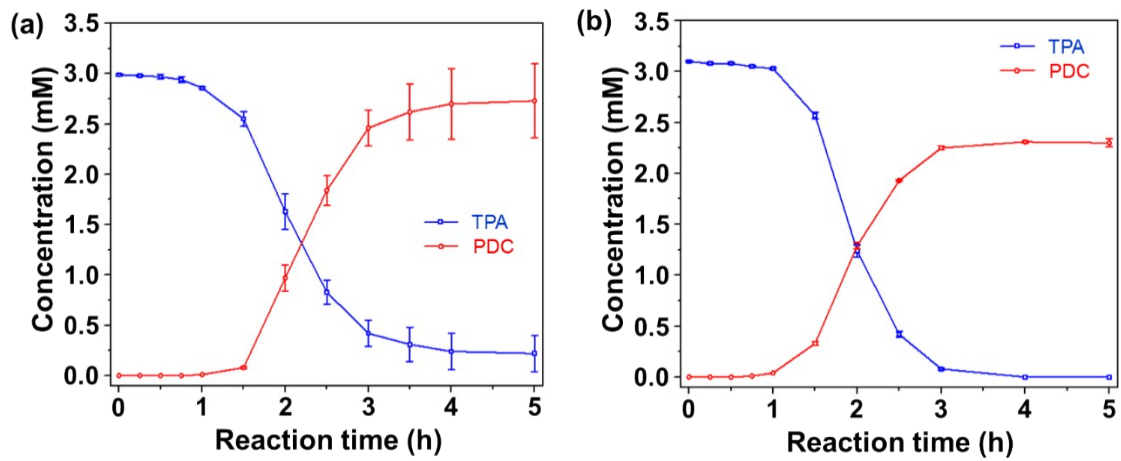

**Fig. S14.** Time course profiling of the TPA consumption and PDC production in (a) the single-catalyst system comprised with *E. coli* PDC<sub>TPA</sub> strain (OD<sub>600</sub>=30) and (b) The double-catalyst system comprised with *E. coli* PCA<sub>strain</sub> (OD<sub>600</sub>=10) and *E. coli* PDC<sub>PCA</sub> strain (OD<sub>600</sub>= 30).

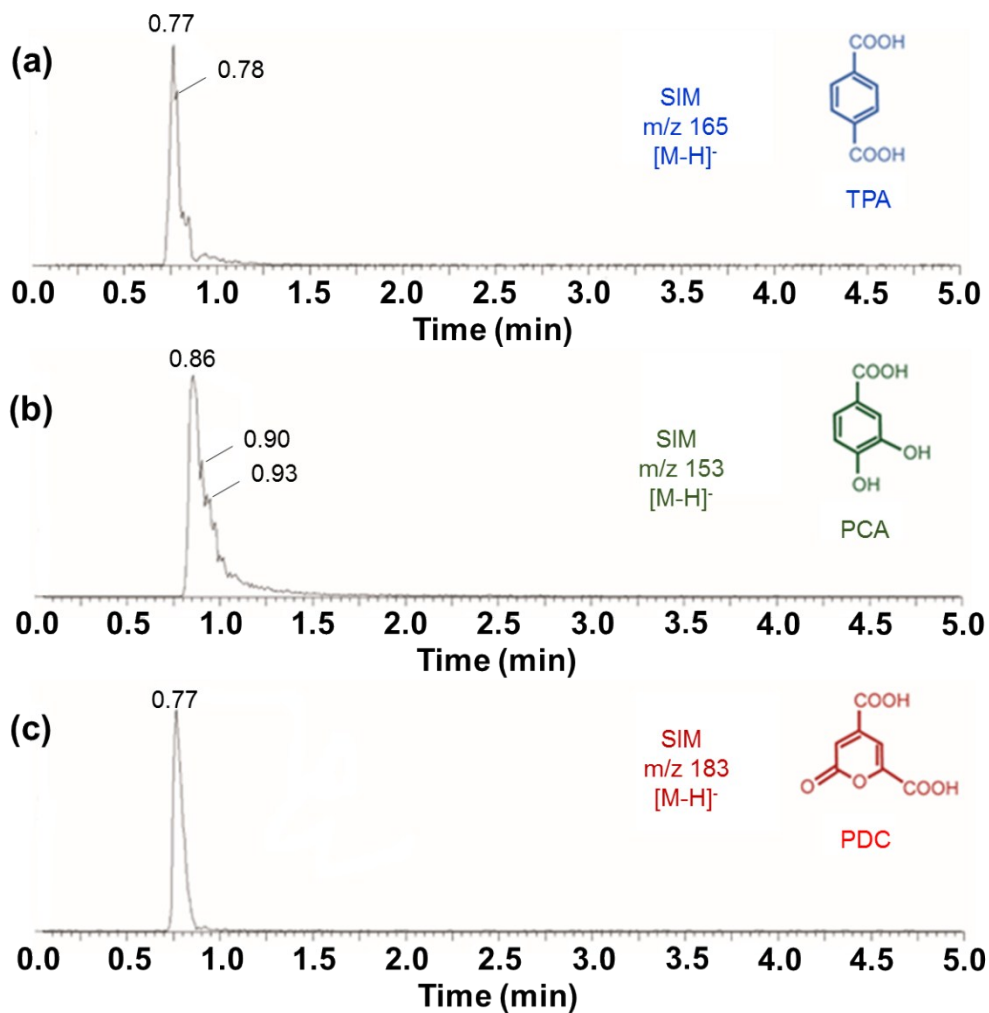

**Fig. S15.** LC-MS SIM chromatograms of (a) TPA standard, (b) PCA standard and (c) PDC authentic standard obtained by whole cell conversion reaction of PCA.



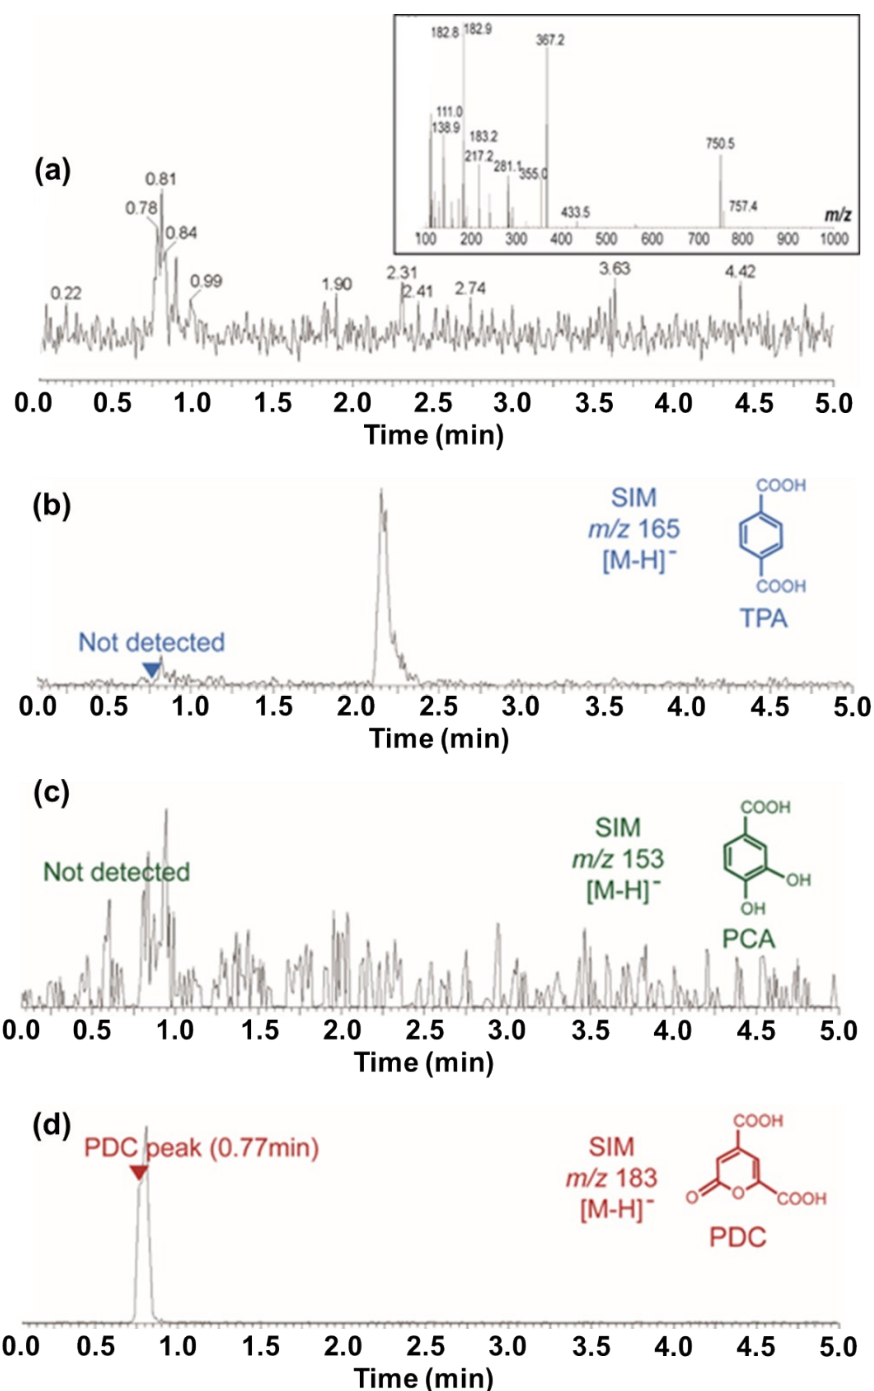

**Fig. S16.** LC-MS analysis of reaction mixture. (a) LC-MS scan mode of reaction mixture. LC-MS SIM mode to identify (b) TPA, (c) PCA and (d) PDC in reaction mixture. Reaction mixture was obtained by whole cell conversion reaction with TPA and double-catalyst system comprised with *E. coli* PCA strain (OD<sub>600</sub>=15) and *E. coli* PDCPCA strain (OD<sub>600</sub>= 35) for 3 h at 300 K and 200 rpm in TG buffer system (pH 7.0).

## REFERENCES

1. J. M. Perez, W. S. Kontur, M. Alherech, J. Coplien, S. D. Karlen, S. S. Stahl, T. J. Donohue and D. R. Noguera, *Green Chem.* 2019, **21**, 1340-1350.
